# Supplementary material
Source: PubMed Central journal article supplement (PMC7733692)

FigureS1

**A**

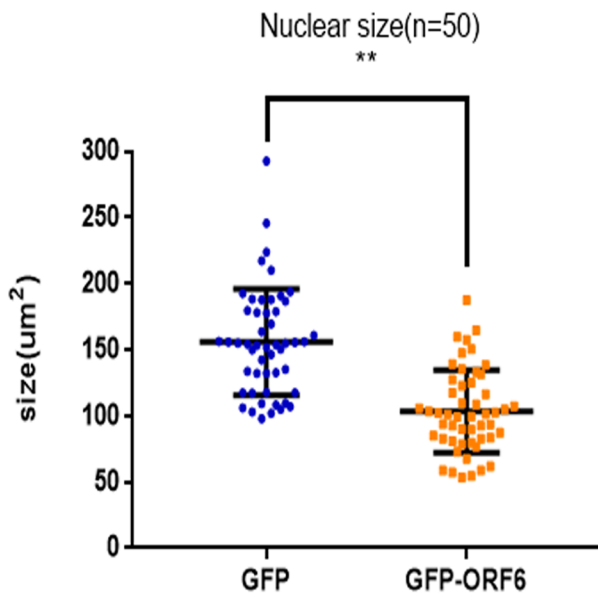

**B**

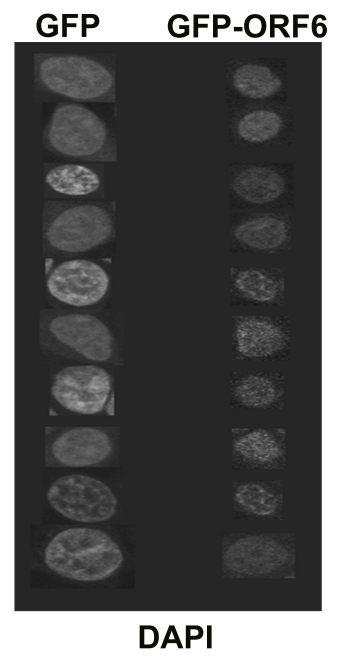

Supplement: mmc1.pdf [file mmc1.pdf]

**A**

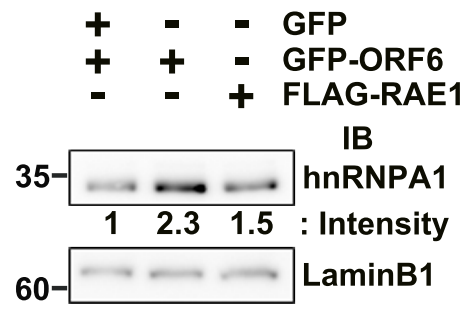

**B**

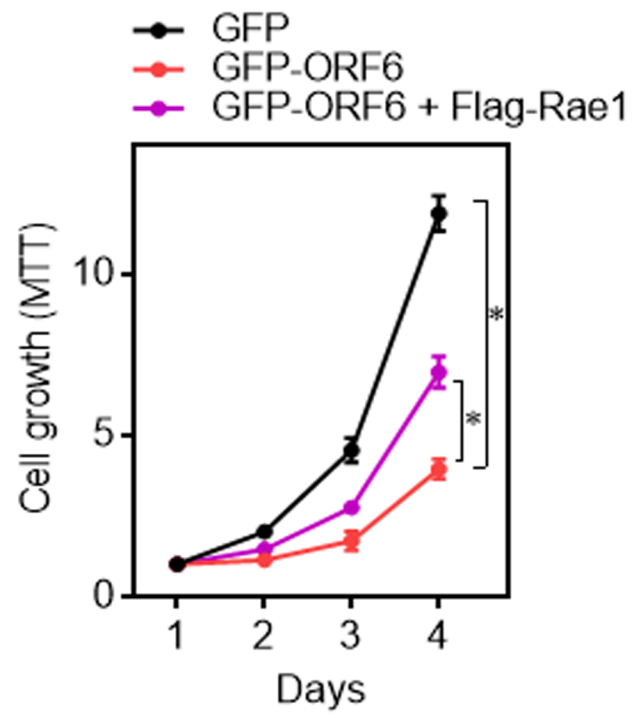

Supplement: mmc2.pdf [file mmc2.pdf]

Figure S3

SARS-Cov 2 ORF6

Model 1

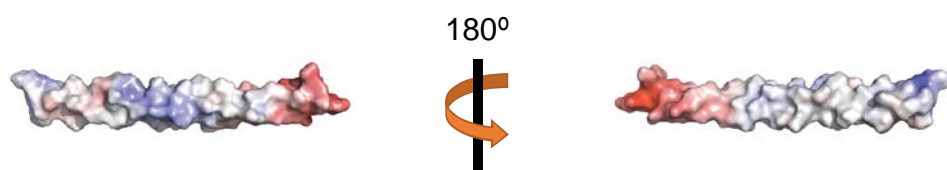

Model 2

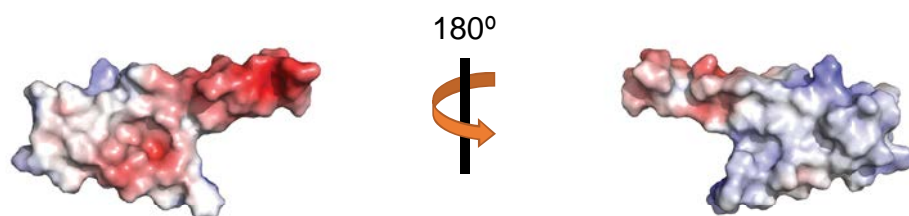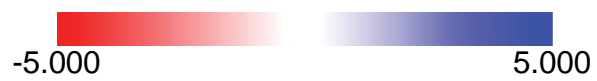

Supplement: mmc3.pdf [file mmc3.pdf]
